# Supplementary material for: First-dose ChAdOx1 and BNT162b2 COVID-19 vaccines and thrombocytopenic, thromboembolic and hemorrhagic events in Scotland
Source: PubMed Central journal article supplement (PMC8282499; doi:10.1038/s41591-021-01408-4), 2021-06-09
Supplement: 41591_2021_1408_MOESM1_ESM.pdf [file 41591_2021_1408_MOESM1_ESM.pdf]

---

**Supplementary information**

---

**First-dose ChAdOx1 and BNT162b2  
COVID-19 vaccines and thrombocytopenic,  
thromboembolic and hemorrhagic events  
in Scotland**

---

In the format provided by the  
authors and unedited

## Supplementary file

**Table 1. Context of vaccine roll-out in Scotland: Joint Committee on Vaccination and Immunisation (JCVI) COVID-19 vaccination priority group list**

| Order of priority | Priority Group                                                                                                                             |
|-------------------|--------------------------------------------------------------------------------------------------------------------------------------------|
| Phase 1           |                                                                                                                                            |
| 1                 | Residents in a care home for older adults and their carers                                                                                 |
| 2                 | All those 80 years of age and over and frontline health and social care workers                                                            |
| 3                 | All those 75 years of age and over                                                                                                         |
| 4                 | All those 70 years of age and over and clinically extremely vulnerable individuals                                                         |
| 5                 | All those 65 years of age and over                                                                                                         |
| 6                 | All individuals aged 16 years to 64 years with underlying health conditions which put them at higher risk of serious disease and mortality |
| 7                 | All those 60 years of age and over                                                                                                         |
| 8                 | All those 55 years of age and over                                                                                                         |
| 9                 | All those 50 years of age and over                                                                                                         |
| Phase 2           |                                                                                                                                            |
| 1                 | All those aged 40-49 years                                                                                                                 |
| 2                 | All those aged 30-39 years                                                                                                                 |

|                                                                                                                                                                                                                                                                                                                                                                                                                                                                                                                                                                                                                                                                                                                                                                                                                                                                                                                                                                                                                                                                                                                                                                                                                                                                                                                                                                                                                                                                                                                                                                                                                                                                                                                                                                                                                                                                                                                                                                                                                                                                                                                                                                  |                            |
|------------------------------------------------------------------------------------------------------------------------------------------------------------------------------------------------------------------------------------------------------------------------------------------------------------------------------------------------------------------------------------------------------------------------------------------------------------------------------------------------------------------------------------------------------------------------------------------------------------------------------------------------------------------------------------------------------------------------------------------------------------------------------------------------------------------------------------------------------------------------------------------------------------------------------------------------------------------------------------------------------------------------------------------------------------------------------------------------------------------------------------------------------------------------------------------------------------------------------------------------------------------------------------------------------------------------------------------------------------------------------------------------------------------------------------------------------------------------------------------------------------------------------------------------------------------------------------------------------------------------------------------------------------------------------------------------------------------------------------------------------------------------------------------------------------------------------------------------------------------------------------------------------------------------------------------------------------------------------------------------------------------------------------------------------------------------------------------------------------------------------------------------------------------|----------------------------|
| 3                                                                                                                                                                                                                                                                                                                                                                                                                                                                                                                                                                                                                                                                                                                                                                                                                                                                                                                                                                                                                                                                                                                                                                                                                                                                                                                                                                                                                                                                                                                                                                                                                                                                                                                                                                                                                                                                                                                                                                                                                                                                                                                                                                | All those aged 18-29 years |
| <p>Note: The vaccine roll-out strategy has been determined by an independent UK-wide body, namely the Joint Commission on Vaccinations and Immunisation (JCVI),<sup>1</sup> which has prioritised vaccinations to adults on the basis of assessing the risk of serious COVID-19 outcomes, in particular hospitalisations and deaths.<sup>1</sup> The offer of vaccination during phase 2 is age-based starting with the oldest adjust first and proceeding in the order as listed.<sup>2</sup></p> <p>Because of the different storage requirements for the two vaccines, GPs have administered the ChAdOx1 (Oxford-AstraZeneca) vaccine and vaccine centres have mainly administered the BNT162b2 (Pfizer-BioNTech) vaccine. Guided by JCVI priorities, GPs began by focusing their efforts on: a) the mobile elderly who they vaccinated in their general practice surgeries; and b) care home residents affiliated with general practices. Vaccination centres began with focusing on health and social care providers before extending to other JCVI priority groups.</p> <p>1. Joint Committee on Vaccination and Immunisation. Priority groups for coronavirus (COVID-19) vaccination: advice from the JCVI, 30 December 2020. Available from: <a href="https://www.gov.uk/government/publications/priority-groups-for-coronavirus-covid-19-vaccination-advice-from-the-jcvi-30-december-2020">https://www.gov.uk/government/publications/priority-groups-for-coronavirus-covid-19-vaccination-advice-from-the-jcvi-30-december-2020</a></p> <p>2. Joint Committee on Vaccination and Immunisation. JCVI interim statement on phase 2 of the COVID-19 vaccination programme. Available from: <a href="https://www.gov.uk/government/publications/priority-groups-for-phase-2-of-the-coronavirus-covid-19-vaccination-programme-advice-from-the-jcvi/jcvi-interim-statement-on-phase-2-of-the-covid-19-vaccination-programme">https://www.gov.uk/government/publications/priority-groups-for-phase-2-of-the-coronavirus-covid-19-vaccination-programme-advice-from-the-jcvi/jcvi-interim-statement-on-phase-2-of-the-covid-19-vaccination-programme</a></p> |                            |

**Table 2. Investigation of confounding with co-morbid risk group and rate ratio associated with idiopathic thrombocytopenic purpura, haemorrhage and arterial thrombosis**

| Additional risk factors adjusted for  | ITP  |      |       | Haemorrhage |      |      | Arterial Thrombosis |      |      |
|---------------------------------------|------|------|-------|-------------|------|------|---------------------|------|------|
|                                       | RR   | LCL  | UCL   | RR          | LCL  | UCL  | RR                  | LCL  | UCL  |
| None                                  | 5.77 | 2.41 | 13.83 | 1.48        | 1.12 | 1.96 | 1.22                | 1.11 | 1.34 |
| Atrial fibrillation                   | 5.76 | 2.40 | 13.80 | 1.48        | 1.13 | 1.97 | 1.22                | 1.11 | 1.34 |
| Asthma                                | 5.64 | 2.35 | 13.53 | 1.48        | 1.13 | 1.97 | 1.22                | 1.11 | 1.34 |
| Blood cancers                         | 6.00 | 2.44 | 14.77 | 1.49        | 1.13 | 1.98 | 1.22                | 1.11 | 1.34 |
| Congestive cardiac failure            | 5.71 | 2.39 | 13.63 | 1.48        | 1.12 | 1.96 | 1.22                | 1.11 | 1.34 |
| Coronary Heart Disease                | 5.85 | 2.44 | 14.05 | 1.48        | 1.12 | 1.96 | 1.23                | 1.12 | 1.35 |
| Liver cirrhosis                       | 5.93 | 2.47 | 14.26 | 1.48        | 1.12 | 1.96 | 1.22                | 1.11 | 1.34 |
| Congenital heart disease              | 5.72 | 2.38 | 13.74 | 1.48        | 1.12 | 1.96 | 1.22                | 1.11 | 1.34 |
| Chronic obstructive pulmonary disease | 5.53 | 2.28 | 13.42 | 1.48        | 1.13 | 1.97 | 1.23                | 1.12 | 1.35 |
| Dementia                              | 5.68 | 2.37 | 13.64 | 1.48        | 1.12 | 1.96 | 1.22                | 1.11 | 1.33 |
| Diabetes type 1                       | 5.52 | 2.28 | 13.35 | 1.44        | 1.09 | 1.91 | 1.22                | 1.11 | 1.34 |
| Diabetes type 2                       | 5.75 | 2.40 | 13.78 | 1.48        | 1.12 | 1.96 | 1.22                | 1.11 | 1.34 |
| Epilepsy                              | 6.19 | 2.55 | 15.05 | 1.48        | 1.12 | 1.96 | 1.22                | 1.11 | 1.34 |
| Fracture                              | 5.55 | 2.31 | 13.38 | 1.48        | 1.12 | 1.96 | 1.22                | 1.11 | 1.34 |
| Parkinson's                           | 5.67 | 2.37 | 13.59 | 1.48        | 1.12 | 1.96 | 1.22                | 1.11 | 1.34 |
| Pulmonary hypertension                | 5.74 | 2.40 | 13.79 | 1.48        | 1.12 | 1.96 | 1.22                | 1.11 | 1.34 |
| Rare pulmonary conditions             | 5.94 | 2.41 | 14.66 | 1.48        | 1.12 | 1.96 | 1.22                | 1.11 | 1.34 |
| Peripheral vascular disease           | 5.77 | 2.41 | 13.83 | 1.48        | 1.12 | 1.96 | 1.22                | 1.11 | 1.34 |
| Rheumatoid arthritis, SLE             | 5.76 | 2.40 | 13.83 | 1.48        | 1.12 | 1.96 | 1.22                | 1.12 | 1.34 |
| Severe mental illness                 | 5.86 | 2.43 | 14.17 | 1.47        | 1.11 | 1.95 | 1.22                | 1.11 | 1.34 |
| Stroke                                | 5.77 | 2.41 | 13.83 | 1.48        | 1.12 | 1.96 | 1.22                | 1.11 | 1.33 |
| Venous thromboembolism                | 5.80 | 2.41 | 13.94 | 1.48        | 1.12 | 1.96 | 1.22                | 1.11 | 1.34 |
| Elderly care home                     | 5.87 | 2.44 | 14.14 | 1.47        | 1.12 | 1.95 | 1.22                | 1.11 | 1.34 |
| Homeless                              | 5.76 | 2.39 | 13.90 | 1.49        | 1.13 | 1.97 | 1.21                | 1.11 | 1.33 |
| Learning disability                   | 5.44 | 2.25 | 13.14 | 1.48        | 1.13 | 1.97 | 1.23                | 1.12 | 1.34 |
| Chronic kidney disease (level 3+)     | 5.97 | 2.48 | 14.35 | 1.48        | 1.13 | 1.97 | 1.22                | 1.11 | 1.34 |
| Smoking status                        | 5.75 | 2.40 | 13.80 | 1.46        | 1.11 | 1.93 | 1.20                | 1.09 | 1.32 |
| Blood Pressure                        | 5.77 | 2.40 | 13.92 | 1.45        | 1.10 | 1.92 | 1.18                | 1.08 | 1.30 |

|                 |      |      |       |      |      |      |      |      |      |
|-----------------|------|------|-------|------|------|------|------|------|------|
| Body mass index | 5.34 | 2.21 | 12.88 | 1.47 | 1.12 | 1.95 | 1.22 | 1.11 | 1.34 |
|-----------------|------|------|-------|------|------|------|------|------|------|

ITP: idiopathic thrombocytopenic purpura; SLE: Systemic lupus erythematosus.

Note: The rate ratios were derived from adding the comorbid factors to the fully adjusted model, one at a time, and then extracting the coefficient associated with the ChAdOx1 vaccine. The aim is to see if the ChAdOx1 rate ratio reported in the main paper is potentially confounded by a risk group. There is no evidence that there is any confounding of the association with vaccination and any risk group.

Of all the risk groups investigated only blood cancer was associated with an increased risk of ITP over and above the matching and the effect of number of co-morbidity groups, socioeconomic status and RT-PCR testing.

A similar investigation was carried out for thrombosis where the rate ratio associated with BNT162b2 was less than 1. For both vaccines there was no evidence that the rate ratios reported in the main paper changed with addition of the co-morbid conditions; nor was there any evidence of an interactive effect. The risk factors in the above table were all binary with the exception of homeless ( 0 - neither homeless nor care home, 1 - care home, 2 homeless), Learning Disability (0 - neither learning disability nor Down's, 1 - Learning disability, 2 - Down's), Chronic Kidney Disease (0 - No CKD, 1 - CKD3, 2 - CKD4, 3- CKD5), Smoking Status (Non Smoker, Unknown, Smoker, Ex Smoker), Blood Pressure (No Investigation, Unknown, Normal, High, Low, Very High ) BMI (under 20, 20-24, 25-29, 30-34, 35-39, 40+).

The main factors in the adjusting models were number of Q Covid risk groups 0,1,2,3,4,5+, Deprivation - Scottish index of Multiple Deprivation in Quintiles 1 (lowest deprivation) to 5 (highest deprivation) plus an unknown level for the few individuals whose post code information was incomplete or missing, and the number of PCR tests between 1 March 2020 and 7 December 2020 - 0, 1, 2, 3, 4-9, 10+. These variables were used, along with the matching variables age and sex, as they are predictive of both the outcomes (risk groups and deprivation) and vaccination uptake (all three - those vaccinated early tended to be individuals who had had multiple tests such as care home residents, health and social care residents and individuals who had been admitted to hospital.)

**Table 3. Self-controlled case series analysis among vaccinated individuals with the event post-vaccination risk period compared to the pre-vaccination not at-risk period**

| <b>Idiopathic thrombocytopenic purpura (ITP)</b>    |                   |            |            |
|-----------------------------------------------------|-------------------|------------|------------|
|                                                     | <b>Risk Ratio</b> | <b>LCL</b> | <b>UCL</b> |
| BNT162b2: Pre-vaccination                           | 1.00              |            |            |
| BNT162b2: 1-14 days before-vaccination              | 0.45              | 0.14       | 1.45       |
| BNT162b2: 0-28 days post-vaccination                | 0.90              | 0.47       | 1.70       |
| ChAdOx1: Pre-vaccination                            | 1.00              |            |            |
| ChAdOx1: 1-14 days before-vaccination               | 1.55              | 0.87       | 2.78       |
| ChAdOx1: 0-28 days post-vaccination                 | 1.98              | 1.29       | 3.02       |
| <b>Thrombocytopenia (excluding ITP)</b>             |                   |            |            |
|                                                     | <b>Risk Ratio</b> | <b>LCL</b> | <b>UCL</b> |
| BNT162b2: pre-vaccination                           | 1.00              |            |            |
| BNT162b2: 1-14 days before vaccination              | 0.82              | 0.44       | 1.54       |
| BNT162b2: 0-28 days post-vaccination                | 0.82              | 0.51       | 1.32       |
| ChAdOx1: pre-vaccination                            | 1.00              |            |            |
| ChAdOx1: 1-14 days before-vaccination               | 1.25              | 0.88       | 1.77       |
| ChAdOx1: 0-28 days post-vaccination                 | 1.07              | 0.80       | 1.42       |
| <b>Haemorrhagic events</b>                          |                   |            |            |
|                                                     | <b>Risk Ratio</b> | <b>LCL</b> | <b>UCL</b> |
| BNT162b2: pre-vaccination                           | 1.00              |            |            |
| BNT162b2: 1-14 days before vaccination              | 0.93              | 0.67       | 1.30       |
| BNT162b2: 0-28 days post-vaccination                | 0.87              | 0.67       | 1.12       |
| ChAdOx1: pre-vaccination                            | 1.00              |            |            |
| ChAdOx1: 1-14 days before-vaccination               | 0.70              | 0.56       | 0.88       |
| ChAdOx1: 0-28 days post-vaccination                 | 0.95              | 0.82       | 1.11       |
| <b>Venous thromboembolic events, including CVST</b> |                   |            |            |
|                                                     | <b>Risk Ratio</b> | <b>LCL</b> | <b>UCL</b> |
| BNT162b2: pre-vaccination                           | 1.00              |            |            |
| BNT162b2: 1-14 days before vaccination              | 0.86              | 0.72       | 1.03       |
| BNT162b2: 0-28 days post-vaccination                | 0.94              | 0.83       | 1.07       |
| ChAdOx1: pre-vaccination                            | 1.00              |            |            |
| ChAdOx1: 1-14 days before-vaccination               | 0.94              | 0.85       | 1.04       |
| ChAdOx1: 0-28 days post-vaccination                 | 0.94              | 0.87       | 1.02       |
| <b>Arterial thromboembolic events</b>               |                   |            |            |
|                                                     | <b>Risk Ratio</b> | <b>LCL</b> | <b>UCL</b> |
| BNT162b2: pre-vaccination                           | 1.00              |            |            |
| BNT162b2: 1-14 days before vaccination              | 0.83              | 0.76       | 0.91       |
| BNT162b2: 0-28 days post-vaccination                | 0.94              | 0.88       | 1.00       |

|                                       |      |      |      |
|---------------------------------------|------|------|------|
| ChAdOx1: pre-vaccination              | 1.00 |      |      |
| ChAdOx1: 1-14 days before-vaccination | 0.90 | 0.85 | 0.96 |
| ChAdOx1: 0-28 days post-vaccination   | 0.97 | 0.93 | 1.02 |

**Table 4. Self-controlled case series analysis among vaccinated and unvaccinated individuals with the idiopathic thrombocytopenic purpura event post-vaccination risk period compared to the unvaccinated period and adjusting for calendar time, using data up to 31 March 2021**

| All Cases                                 | Idiopathic thrombocytopenic purpura (ITP) |              |                     |            |      |      |                     |      |      |
|-------------------------------------------|-------------------------------------------|--------------|---------------------|------------|------|------|---------------------|------|------|
|                                           | Unadjusted                                |              |                     |            |      |      | Adjusted for period |      |      |
| Exposure                                  | Number                                    | Days at Risk | Event Rate per week | Risk Ratio | LCL  | UCL  | Risk Ratio          | LCL  | UCL  |
| Pre-vaccination                           | 250                                       | 30963        | 0.0565              | 1.00       |      |      | 1.00                |      |      |
| BNT162b2: 1 to 14 days before vaccination | ≤5                                        | 378          | 0.0556              | 0.19       | 0.04 | 0.85 | 0.12                | 0.03 | 0.58 |
| BNT162b2: 0 to 28 days post-vaccination   | 13                                        | 1320         | 0.0689              | 0.98       | 0.38 | 2.53 | 0.58                | 0.21 | 1.61 |
| ChAdOx1: 1 to 14 days before-vaccination  | 11                                        | 708          | 0.109               | 1.21       | 0.62 | 2.38 | 0.80                | 0.39 | 1.64 |
| ChAdOx1: 0 to 28 days post-vaccination    | 27                                        | 2085         | 0.0906              | 2.20       | 1.34 | 3.62 | 1.28                | 0.68 | 2.41 |
| <b>Cases who were never vaccinated</b>    |                                           |              |                     |            |      |      |                     |      |      |
| Period                                    | Number                                    | Days at Risk | Event Rate per week | Risk Ratio | LCL  | UCL  |                     |      |      |
| August 26 to October 06, 2020             | 19                                        | 2460         | 0.0541              | 1.00       |      |      |                     |      |      |
| October 7 to November 16, 2020            | 11                                        | 2424         | 0.0318              | 0.60       | 0.26 | 1.39 |                     |      |      |
| November 17 to December 27, 2020          | 15                                        | 2419         | 0.0434              | 0.87       | 0.40 | 1.90 |                     |      |      |
| December 28, 2020 to February 6, 2021     | 19                                        | 2377         | 0.056               | 1.06       | 0.51 | 2.22 |                     |      |      |
| February 7 to March 18, 2021              | 27                                        | 2208         | 0.0856              | 2.01       | 1.01 | 4.03 |                     |      |      |

Note: The estimates for the standard SCCS analysis using only vaccinated individuals with the event in the period 104 days prior to vaccination to 28 days following vaccination are shown in Table S3. This shows elevated risks for ChAdOx1 vaccination for ITP when compared to the pre-vaccination period.

The SCCS analysis using all ITP events after 26 August 2020 is based upon 313 events by 182 individual patients. Most individuals only had one event but there are six with more than five events in the seven-month period. The interpretation of the SCCS for ITP depends crucially on the role of the period effect. The unadjusted analysis shows an increased risk of ITP post-ChAdOx1 vaccination with a risk ratio of 2.20 (95% CI 1.34 - 3.62). The addition of the period effect leads to the estimate changing to 1.28 (95% CI 0.68 - 2.41) but this is highly correlated with ChAdOx1 roll-out. The addition of the period effect has a



p-value of 0.035 but 86% of the time at risk in the ChAdOx1 post-vaccination risk period occurs in the final period 7 February to 18 March 2021. Among those who were never vaccinated there is some evidence of a changing pattern in events over time,  $p=0.03$ , with an increased risk in the final period compared to the first. A sensitivity analysis using a pre-vaccination risk period of 42 days revealed similar results.

**Table 5. Prediction of ITP, haemorrhage or arterial thromboembolic event within 28 days post-vaccination**

| Variable                    | Risk Ratio       | P-value |
|-----------------------------|------------------|---------|
| Sex – male                  | 1.31 (1.23-1.39) | <0.0001 |
| Heart failure               | 1.15 (1.02-1.29) | 0.0207  |
| Coronary heart disease      | 2.43 (2.28-2.60) | <0.0001 |
| Peripheral vascular disease | 1.27 (1.12-1.44) | 0.0001  |
| Severe mental illness       | 1.11 (1.03-1.20) | 0.0081  |
| Sickle cell disease         | 2.14 (1.15-4.00) | 0.0169  |
| Prior stroke                | 1.93 (1.79-2.09) | <0.0001 |
| Diabetes                    |                  |         |
| Type 1                      | 2.56 (1.97-3.31) | 0.0000  |
| Type 2                      | 1.28 (1.20-1.38) | 0.0000  |
| Chronic Kidney disease:     |                  |         |
| None                        | 1.00             |         |
| Stage 3                     | 1.05 (0.97-1.14) | 0.2496  |
| Stage 4                     | 1.24 (0.91-1.69) | 0.1811  |
| Stage 5                     | 1.89 (1.30-2.73) | 0.0008  |
| Blood pressure              |                  |         |
| High                        | 1.00             |         |
| Low                         | 0.70 (0.51-0.97) | 0.0329  |
| No investigation            | 0.83 (0.67-1.02) | 0.0756  |
| Normal                      | 0.95 (0.88-1.03) | 0.2049  |
| Unknown                     | 0.61 (0.49-0.76) | 0.0000  |
| Very high                   | 1.27 (1.10-1.47) | 0.0014  |
| Smoking status              |                  |         |
| Ex-smoker                   | 1.00             |         |
| Non-smoker                  | 0.93 (0.86-1.00) | 0.0658  |
| Smoker                      | 1.20 (1.11-1.30) | 0.0000  |
| Unknown                     | 1.26 (1.04-1.53) | 0.0197  |

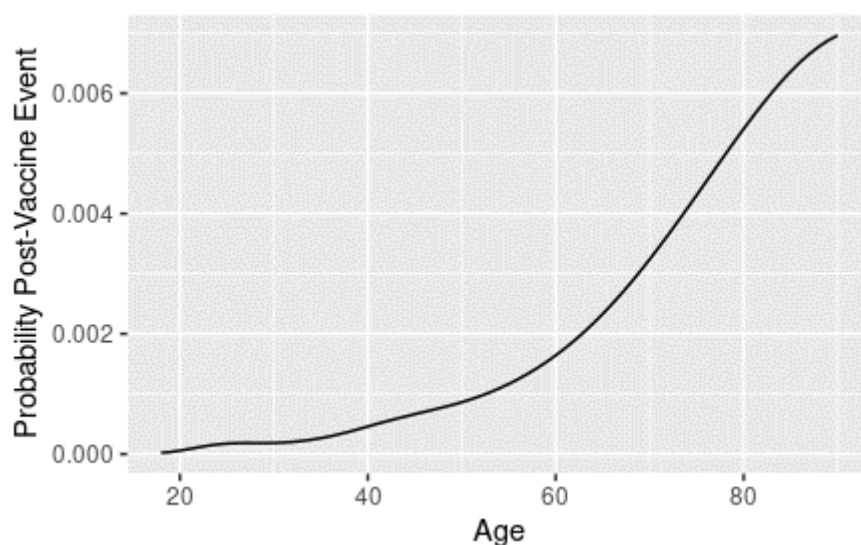

**Table S6. Read codes for outcomes of interest**

| Code                                             | Description                                                          |
|--------------------------------------------------|----------------------------------------------------------------------|
| <b>Thrombocytopenia</b>                          |                                                                      |
| 42P2                                             | Thrombocytopenia                                                     |
| D313.                                            | Primary thrombocytopenia                                             |
| D3133                                            | [X]Essential thrombocytopenia NOS                                    |
| D313y                                            | Other specified primary thrombocytopenia                             |
| D313z                                            | Primary thrombocytopenia NOS                                         |
| D314                                             | Secondary thrombocytopenia                                           |
| D3141                                            | Thrombocytopenia due to drugs                                        |
| D314y                                            | Other specified secondary thrombocytopenia                           |
| D314z                                            | Secondary thrombocytopenia NOS                                       |
| D315                                             | Thrombocytopenia NOS                                                 |
| Dyu32                                            | [X]Other primary thrombocytopenia                                    |
| <b>Idiopathic thrombocytopenic purpura (ITP)</b> |                                                                      |
| D3130                                            | Idiopathic thrombocytopenic purpura                                  |
| <b>Venous thromboembolic events</b>              |                                                                      |
| 8CMWA                                            | On deep vein thrombosis care pathway <sup>s</sup>                    |
| G801.                                            | Deep vein phlebitis and thrombophlebitis of the leg <sup>s</sup>     |
| G801B                                            | Deep vein thrombophlebitis of the leg unspecified <sup>s</sup>       |
| G801D                                            | Deep vein thrombosis of lower limb <sup>s</sup>                      |
| G801F                                            | Deep vein thrombosis of peroneal vein <sup>s</sup>                   |
| G801z                                            | Deep vein phlebitis and thrombophlebitis of the leg NOS <sup>s</sup> |
| G8020                                            | Thrombosis of vein of leg <sup>s</sup>                               |
| G80y4                                            | Thrombophlebitis of the common iliac vein                            |
| G80y6                                            | Thrombophlebitis of the external iliac vein                          |
| G401.                                            | Pulmonary embolism <sup>b</sup>                                      |
| G4011                                            | Recurrent pulmonary embolism <sup>b</sup>                            |

|                                                |                                                           |
|------------------------------------------------|-----------------------------------------------------------|
| G81..                                          | Portal vein thrombosis                                    |
| G82..                                          | Other venous embolism and thrombosis                      |
| G820.                                          | Budd - Chiari syndrome (hepatic vein thrombosis)          |
| G821.                                          | Thrombophlebitis migrans                                  |
| G822.                                          | Embolism and thrombosis of the vena cava                  |
| G823.                                          | Embolism and thrombosis of the renal vein                 |
| G82y.                                          | Other embolism and thrombosis                             |
| G82z.                                          | Embolism and thrombosis NOS                               |
| G82z0                                          | Embolus of vein NOS                                       |
| G82z1                                          | Thrombosis of vein NOS                                    |
| G82zz                                          | Embolism and thrombosis NOS                               |
| F4238                                          | Central retinal vein occlusion                            |
| 8HTm.                                          | Referral to deep vein thrombosis clinic                   |
| <b>Cerebral venous sinus thrombosis (CVST)</b> |                                                           |
| G67A.                                          | Cerebral vein thrombosis                                  |
| F051z                                          | Thrombosis of central nervous system venous sinus NOS     |
| F053.                                          | Thrombophlebitis of central nervous system venous sinuses |
| G676.                                          | Nonpyogenic venous sinus thrombosis                       |
| F05..                                          | Phlebitis and thrombophlebitis of intracranial sinuses    |
| F050.                                          | Embolism of central nervous system venous sinus           |
| F0500                                          | Embolism cavernous sinus                                  |
| F0501                                          | Embolism superior longitudinal sinus                      |
| F0502                                          | Embolism lateral sinus                                    |
| F0503                                          | Embolism transverse sinus                                 |
| F050z                                          | Embolism central nervous system venous sinus NOS          |
| F051.                                          | Thrombosis of central nervous system venous sinuses       |
| F0510                                          | Thrombosis cavernous sinus                                |
| F0511                                          | Thrombosis of superior longitudinal sinus                 |

|                                       |                                                             |
|---------------------------------------|-------------------------------------------------------------|
| F0512                                 | Thrombosis lateral sinus                                    |
| F0513                                 | Thrombosis transverse sinus                                 |
| F052.                                 | Phlebitis of central nervous system venous sinuses          |
| F0520                                 | Phlebitis cavernous sinus                                   |
| F0521                                 | Phlebitis of superior longitudinal sinus                    |
| F0522                                 | Phlebitis lateral sinus                                     |
| F0523                                 | Phlebitis transverse sinus                                  |
| F052z                                 | Phlebitis of central nervous system venous sinus NOS        |
| F0530                                 | Thrombophlebitis of cavernous sinus                         |
| F0531                                 | Thrombophlebitis of superior longitudinal venous sinus      |
| F0532                                 | Thrombophlebitis lateral venous sinus                       |
| F053z                                 | Thrombophlebitis of central nervous system venous sinus NOS |
| F05z.                                 | Phlebitis or thrombophlebitis of CNS venous sinus NOS       |
| <b>Arterial thromboembolic events</b> |                                                             |
| G63..                                 | Precerebral arterial occlusion                              |
| G630.                                 | Basilar artery occlusion                                    |
| G631.                                 | Carotid artery occlusion                                    |
| G632.                                 | Vertebral artery occlusion                                  |
| G633.                                 | Multiple and bilateral precerebral arterial occlusion       |
| G634.                                 | Carotid artery stenosis                                     |
| G63y.                                 | Other precerebral artery occlusion                          |
| G63y0                                 | Cerebral infarct due to thrombosis of precerebral arteries  |
| G63y1                                 | Cerebral infarction due to embolism of precerebral arteries |
| G63z.                                 | Precerebral artery occlusion NOS                            |
| G64..                                 | Cerebral arterial occlusion                                 |
| G640.                                 | Cerebral thrombosis                                         |
| G6400                                 | Cerebral infarction due to thrombosis of cerebral arteries  |
| G641.                                 | Cerebral embolism                                           |

|       |                                                          |
|-------|----------------------------------------------------------|
| G6410 | Cerebral infarction due to embolism of cerebral arteries |
| G64z. | Cerebral infarction NOS                                  |
| G64z0 | Brainstem infarction                                     |
| G64z1 | Wallenberg syndrome                                      |
| G64z2 | Left sided cerebral infarction                           |
| G64z3 | Right sided cerebral infarction                          |
| G65.. | Transient cerebral ischaemia                             |
| G650. | Basilar artery syndrome                                  |
| G651. | Vertebral artery syndrome                                |
| G6510 | Vertebro-basilar artery syndrome                         |
| G652. | Subclavian steal syndrome                                |
| G653. | Carotid artery syndrome hemispheric                      |
| G654. | Multiple and bilateral precerebral artery syndromes      |
| G65y. | Other transient cerebral ischaemia                       |
| G65z. | Transient cerebral ischaemia NOS                         |
| G65z0 | Impending cerebral ischaemia                             |
| G65z1 | Intermittent cerebral ischaemia                          |
| G65zz | Transient cerebral ischaemia NOS                         |
| G66.. | Stroke and cerebrovascular accident unspecified          |
| G660. | Middle cerebral artery syndrome                          |
| G661. | Anterior cerebral artery syndrome                        |
| G662. | Posterior cerebral artery syndrome                       |
| G663. | Brain stem stroke syndrome                               |
| G664. | Cerebellar stroke syndrome                               |
| G665. | Pure motor lacunar syndrome                              |
| G666. | Pure sensory lacunar syndrome                            |
| G667. | Left sided CVA                                           |
| G668. | Right sided CVA                                          |

|       |                                                              |
|-------|--------------------------------------------------------------|
| G67.. | Other cerebrovascular disease                                |
| G670. | Cerebral atherosclerosis                                     |
| G671. | Generalised ischaemic cerebrovascular disease NOS            |
| G6710 | Acute cerebrovascular insufficiency NOS                      |
| G6711 | Chronic cerebral ischaemia                                   |
| G671z | Generalised ischaemic cerebrovascular disease NOS            |
| G6730 | Dissection of cerebral arteries, nonruptured                 |
| G677. | Occlusion/stenosis cerebral arts not result cerebral infarct |
| G6770 | Occlusion and stenosis of middle cerebral artery             |
| G6771 | Occlusion and stenosis of anterior cerebral artery           |
| G6772 | Occlusion and stenosis of posterior cerebral artery          |
| G6773 | Occlusion and stenosis of cerebellar arteries                |
| G6774 | Occlusion+stenosis of multiple and bilat cerebral arteries   |
| G67y. | Other cerebrovascular disease OS                             |
| G67z. | Other cerebrovascular disease NOS                            |
| G68.. | Late effects of cerebrovascular disease                      |
| G680. | Sequelae of subarachnoid haemorrhage                         |
| G681. | Sequelae of intracerebral haemorrhage                        |
| G682. | Sequelae of other nontraumatic intracranial haemorrhage      |
| G683. | Sequelae of cerebral infarction                              |
| G68W. | Sequelae/other + unspecified cerebrovascular diseases        |
| G68X. | Sequelae of stroke,not specfd as h'morrhage or infarction    |
| G6W.. | Cereb infarct due unsp occlus/stenos precerebr arteries      |
| G6X.. | Cerebrl infarctn due/unspcf occlusn or sten/cerebrl artrs    |
| G6y.. | Other specified cerebrovascular disease                      |
| G74.. | Arterial embolism and thrombosis                             |
| G740. | Embolism and thrombosis of the abdominal aorta               |
| G741. | Embolism and thrombosis of the thoracic aorta                |

|       |                                                         |
|-------|---------------------------------------------------------|
| G742. | Embolism and thrombosis of an arm or leg artery         |
| G7420 | Embolism and thrombosis of the brachial artery          |
| G7421 | Embolism and thrombosis of the radial artery            |
| G7422 | Embolism and thrombosis of the ulnar artery             |
| G7423 | Embolism and thrombosis of an arm artery NOS            |
| G7424 | Embolism and thrombosis of the femoral artery           |
| G7425 | Embolism and thrombosis of the popliteal artery         |
| G7426 | Embolism and thrombosis of the anterior tibial artery   |
| G7427 | Embolism and thrombosis of the dorsalis pedis artery    |
| G7428 | Embolism and thrombosis of the posterior tibial artery  |
| G7429 | Embolism and thrombosis of a leg artery NOS             |
| G742z | Peripheral arterial embolism and thrombosis NOS         |
| G743. | Embolism and thrombosis of other and unspec parts aorta |
| G74y. | Embolism and thrombosis of other specified artery       |
| G74y0 | Embolism and/or thrombosis of the common iliac artery   |
| G74y1 | Embolism and/or thrombosis of the internal iliac artery |
| G74y2 | Embolism and/or thrombosis of the external iliac artery |
| G74y3 | Embolism and thrombosis of the iliac artery unspecified |
| G74y5 | Embolism and thrombosis of the subclavian artery        |
| G74y6 | Embolism and thrombosis of the splenic artery           |
| G74y7 | Embolism and thrombosis of the axillary artery          |
| G74y8 | Embolism and thrombosis of the coeliac artery           |
| G74y9 | Embolism and thrombosis of the hepatic artery           |
| G74yz | Embolism and thrombosis of other arteries NOS           |
| G74z. | Arterial embolism and thrombosis NOS                    |
| F423. | Retinal vascular occlusion                              |
| F4230 | Unspecified retinal vascular occlusion                  |
| F4231 | Central retinal artery occlusion                        |



|       |                                                         |
|-------|---------------------------------------------------------|
| F4232 | Retinal arterial branch occlusion                       |
| F4233 | Retinal microembolism                                   |
| F4234 | Hollenhorst plaque                                      |
| F4235 | Retinal partial arterial occlusion NOS                  |
| F4236 | Amaurosis fugax                                         |
| F4237 | Retinal transient arterial occlusion NOS                |
| G3... | Ischaemic heart disease                                 |
| G30.. | Acute myocardial infarction                             |
| G300. | Acute anterolateral infarction                          |
| G301. | Other specified anterior myocardial infarction          |
| G3010 | Acute anteroapical infarction                           |
| G3011 | Acute anteroseptal infarction                           |
| G301z | Anterior myocardial infarction NOS                      |
| G302. | Acute inferolateral infarction                          |
| G303. | Acute inferoposterior infarction                        |
| G304. | Posterior myocardial infarction NOS                     |
| G305. | Lateral myocardial infarction NOS                       |
| G306. | True posterior myocardial infarction                    |
| G307. | Acute subendocardial infarction                         |
| G3070 | Acute non-Q wave infarction                             |
| G3071 | Acute non-ST segment elevation myocardial infarction    |
| G308. | Inferior myocardial infarction NOS                      |
| G309. | Acute Q-wave infarct                                    |
| G30B. | Acute posterolateral myocardial infarction              |
| G30X. | Acute transmural myocardial infarction of unspecif site |
| G30X0 | Acute ST segment elevation myocardial infarction        |
| G30y. | Other acute myocardial infarction                       |
| G30y0 | Acute atrial infarction                                 |

|       |                                                            |
|-------|------------------------------------------------------------|
| G30y1 | Acute papillary muscle infarction                          |
| G30y2 | Acute septal infarction                                    |
| G30yz | Other acute myocardial infarction NOS                      |
| G30z. | Acute myocardial infarction NOS                            |
| G31.. | Other acute and subacute ischaemic heart disease           |
| G310. | Postmyocardial infarction syndrome                         |
| G310. | Dressler's syndrome                                        |
| G3... | Arteriosclerotic heart disease                             |
| G311. | Preinfarction syndrome                                     |
| G3110 | Myocardial infarction aborted                              |
| G3111 | Unstable angina                                            |
| G3112 | Angina at rest                                             |
| G3113 | Refractory angina                                          |
| G3114 | Worsening angina                                           |
| G3115 | Acute coronary syndrome                                    |
| G311z | Preinfarction syndrome NOS                                 |
| G312. | Coronary thrombosis not resulting in myocardial infarction |
| G31y. | Other acute and subacute ischaemic heart disease           |
| G31y0 | Acute coronary insufficiency                               |
| G31y1 | Microinfarction of heart                                   |
| G31y2 | Subendocardial ischaemia                                   |
| G31y3 | Transient myocardial ischaemia                             |
| G31yz | Other acute and subacute ischaemic heart disease NOS       |
| G35.. | Subsequent myocardial infarction                           |
| G350. | Subsequent myocardial infarction of anterior wall          |
| G351. | Subsequent myocardial infarction of inferior wall          |
| G353. | Subsequent myocardial infarction of other sites            |
| G35X. | Subsequent myocardial infarction of unspecified site       |

|                    |                                                              |
|--------------------|--------------------------------------------------------------|
| G36..              | Certain current complication follow acute myocardial infarct |
| G360.              | Haemopericardium/current comp folow acut myocard infarct     |
| G361.              | Atrial septal defect/curr comp folow acut myocardal infarct  |
| G362.              | Ventric septal defect/curr comp fol acut myocardal infarctn  |
| G363.              | Ruptur cardiac wall w/out haemopericard/cur comp fol ac MI   |
| G364.              | Ruptur chordae tendinae/curr comp fol acute myocard infarct  |
| G365.              | Rupture papillary muscle/curr comp fol acute myocard infarct |
| G38..              | Postoperative myocardial infarction                          |
| G380.              | Postoperative transmural myocardial infarction anterior wall |
| G381.              | Postoperative transmural myocardial infarction inferior wall |
| G384.              | Postoperative subendocardial myocardial infarction           |
| G38z.              | Postoperative myocardial infarction; unspecified             |
| G3y..              | Other specified ischaemic heart disease                      |
| G3z..              | Ischaemic heart disease NOS                                  |
| Gyu32              | [X]Other forms of acute ischaemic heart disease              |
| Gyu34              | [X]Acute transmural myocardial infarction of unspecif site   |
| Gyu36              | [X]Subsequent myocardial infarction of unspecified site      |
| <b>Haemorrhage</b> |                                                              |
| G61..              | Intracerebral haemorrhage                                    |
| G610.              | Cortical haemorrhage                                         |
| G611.              | Internal capsule haemorrhage                                 |
| G612.              | Basal nucleus haemorrhage                                    |
| G613.              | Cerebellar haemorrhage                                       |
| G614.              | Pontine haemorrhage                                          |
| G615.              | Bulbar haemorrhage                                           |
| G617.              | Intracerebral haemorrhage, intraventricular                  |
| G619.              | Lobar cerebral haemorrhage                                   |
| G61X.              | Intracerebral haemorrhage in hemisphere, unspecified         |

|       |                                                          |
|-------|----------------------------------------------------------|
| G61X0 | Left sided intracerebral haemorrhage, unspecified        |
| G61X1 | Right sided intracerebral haemorrhage, unspecified       |
| G61z. | Intracerebral haemorrhage NOS                            |
| G62.. | Other and unspecified intracranial haemorrhage           |
| G620. | Extradural haemorrhage – non-traumatic                   |
| G621. | Subdural haemorrhage – non-traumatic                     |
| G623. | Subdural haemorrhage NOS                                 |
| G62z. | Intracranial haemorrhage NOS                             |
| 2BB5. | O/E - retinal haemorrhages                               |
| 2BB8. | O/E - vitreous haemorrhages                              |
| 2DE7. | O/E - throat haemorrhage                                 |
| C1542 | Adrenal haemorrhage                                      |
| F4045 | Intraocular haemorrhage                                  |
| F42y1 | Superficial retinal haemorrhage                          |
| F42y3 | Deep retinal haemorrhage                                 |
| F42y4 | Subretinal haemorrhage                                   |
| F42y5 | Retinal haemorrhage NOS                                  |
| F436. | Choroidal haemorrhage and rupture                        |
| F4360 | Unspecified choroidal haemorrhage                        |
| F4361 | Expulsive choroidal haemorrhage                          |
| F436z | Choroidal haemorrhage or rupture NOS                     |
| F4C72 | Conjunctival haemorrhage NOS                             |
| F4Ey0 | Haemorrhage of eyelid                                    |
| F4H41 | Optic nerve sheath haemorrhage                           |
| F4K28 | Vitreous haemorrhage                                     |
| F4K7. | Retrobulbar haemorrhage                                  |
| FyuH4 | [X]Vitreous haemorrhage in diseases classified elsewhere |
| G8y0. | Haemorrhage NOS                                          |

|       |                                                              |
|-------|--------------------------------------------------------------|
| Gyu61 | [X]Other subarachnoid haemorrhage                            |
| Gyu62 | [X]Other intracerebral haemorrhage                           |
| Gyu6F | [X]Intracerebral haemorrhage in hemisphere, unspecified      |
| K1381 | Renal artery haemorrhage                                     |
| R048. | [D]Throat haemorrhage                                        |
| R0631 | [D]Pulmonary haemorrhage NOS                                 |
| R09z0 | [D]Umbilical bleeding                                        |
| G60.. | Subarachnoid haemorrhage                                     |
| G601. | Subarachnoid haemorrhage from carotid siphon and bifurcation |
| G602. | Subarachnoid haemorrhage from middle cerebral artery         |
| G603. | Subarachnoid haemorrhage from anterior communicating artery  |
| G604. | Subarachnoid haemorrhage from posterior communicating artery |
| G605. | Subarachnoid haemorrhage from basilar artery                 |
| G60z. | Subarachnoid haemorrhage NOS                                 |
| D3... | Clotting and bleeding disorders                              |
| D30.. | Coagulation defects                                          |
| D3z.. | Clotting or bleeding disorder NOS                            |

<sup>a</sup> Deep vein thrombosis <sup>b</sup> Pulmonary embolism

**Table S7. Reporting STROBE and RECORD checklists**

|                      | Item No. | STROBE items                                                                                                                                                                               | RECORD items                                                                                                                                                                                                                                                                                                                                                                                                                                       | Location in manuscript where items are reported |
|----------------------|----------|--------------------------------------------------------------------------------------------------------------------------------------------------------------------------------------------|----------------------------------------------------------------------------------------------------------------------------------------------------------------------------------------------------------------------------------------------------------------------------------------------------------------------------------------------------------------------------------------------------------------------------------------------------|-------------------------------------------------|
| Title and abstract   |          |                                                                                                                                                                                            |                                                                                                                                                                                                                                                                                                                                                                                                                                                    |                                                 |
|                      | 1        | (a) Indicate the study’s design with a commonly used term in the title or the abstract (b) Provide in the abstract an informative and balanced summary of what was done and what was found | <p>RECORD 1.1: The type of data used should be specified in the title or abstract. When possible, the name of the databases used should be included.</p> <p>RECORD 1.2: If applicable, the geographic region and timeframe within which the study took place should be reported in the title or abstract.</p> <p>RECORD 1.3: If linkage between databases was conducted for the study, this should be clearly stated in the title or abstract.</p> | p. 1-6                                          |
| Introduction         |          |                                                                                                                                                                                            |                                                                                                                                                                                                                                                                                                                                                                                                                                                    |                                                 |
| Background rationale | 2        | Explain the scientific background and rationale for the investigation being reported                                                                                                       |                                                                                                                                                                                                                                                                                                                                                                                                                                                    | p. 7-8                                          |
| Objectives           | 3        | State specific objectives, including any prespecified hypotheses                                                                                                                           |                                                                                                                                                                                                                                                                                                                                                                                                                                                    | p. 8                                            |
| Methods              |          |                                                                                                                                                                                            |                                                                                                                                                                                                                                                                                                                                                                                                                                                    |                                                 |

|              |   |                                                                                                                                                                                                                                                                                                                                                                                                                                                                                                                                                                                                                                                                                                                              |                                                                                                                                                                                                                                                                                                                                                                                                                                                                                                                                                                                                                                                                                                      |        |  |
|--------------|---|------------------------------------------------------------------------------------------------------------------------------------------------------------------------------------------------------------------------------------------------------------------------------------------------------------------------------------------------------------------------------------------------------------------------------------------------------------------------------------------------------------------------------------------------------------------------------------------------------------------------------------------------------------------------------------------------------------------------------|------------------------------------------------------------------------------------------------------------------------------------------------------------------------------------------------------------------------------------------------------------------------------------------------------------------------------------------------------------------------------------------------------------------------------------------------------------------------------------------------------------------------------------------------------------------------------------------------------------------------------------------------------------------------------------------------------|--------|--|
| Study Design | 4 | Present key elements of study design early in the paper                                                                                                                                                                                                                                                                                                                                                                                                                                                                                                                                                                                                                                                                      |                                                                                                                                                                                                                                                                                                                                                                                                                                                                                                                                                                                                                                                                                                      | p. 8-9 |  |
| Setting      | 5 | Describe the setting, locations, and relevant dates, including periods of recruitment, exposure, follow-up, and data collection                                                                                                                                                                                                                                                                                                                                                                                                                                                                                                                                                                                              |                                                                                                                                                                                                                                                                                                                                                                                                                                                                                                                                                                                                                                                                                                      | p. 8   |  |
| Participants | 6 | <p><i>(a) Cohort study</i> - Give the eligibility criteria, and the sources and methods of selection of participants. Describe methods of follow-up</p> <p><i>Case-control study</i> - Give the eligibility criteria, and the sources and methods of case ascertainment and control selection. Give the rationale for the choice of cases and controls</p> <p><i>Cross-sectional study</i> - Give the eligibility criteria, and the sources and methods of selection of participants</p> <p><i>(b) Cohort study</i> - For matched studies, give matching criteria and number of exposed and unexposed</p> <p><i>Case-control study</i> - For matched studies, give matching criteria and the number of controls per case</p> | <p>RECORD 6.1: The methods of study population selection (such as codes or algorithms used to identify subjects) should be listed in detail. If this is not possible, an explanation should be provided.</p> <p>RECORD 6.2: Any validation studies of the codes or algorithms used to select the population should be referenced. If validation was conducted for this study and not published elsewhere, detailed methods and results should be provided.</p> <p>RECORD 6.3: If the study involved linkage of databases, consider use of a flow diagram or other graphical display to demonstrate the data linkage process, including the number of individuals with linked data at each stage.</p> | p. 9   |  |
| Variables    | 7 | Clearly define all outcomes, exposures, predictors, potential confounders, and effect modifiers. Give diagnostic criteria, if applicable.                                                                                                                                                                                                                                                                                                                                                                                                                                                                                                                                                                                    | RECORD 7.1: A complete list of codes and algorithms used to classify exposures, outcomes, confounders, and effect modifiers should be provided. If these cannot be reported, an explanation should be provided.                                                                                                                                                                                                                                                                                                                                                                                                                                                                                      | p. 10  |  |

|                              |    |                                                                                                                                                                                                                                                                                                                                                                                                                                                                                                                                                                                              |  |          |  |
|------------------------------|----|----------------------------------------------------------------------------------------------------------------------------------------------------------------------------------------------------------------------------------------------------------------------------------------------------------------------------------------------------------------------------------------------------------------------------------------------------------------------------------------------------------------------------------------------------------------------------------------------|--|----------|--|
| Data sources/<br>measurement | 8  | For each variable of interest, give sources of data and details of methods of assessment (measurement).<br><br>Describe comparability of assessment methods if there is more than one group                                                                                                                                                                                                                                                                                                                                                                                                  |  | p. 9     |  |
| Bias                         | 9  | Describe any efforts to address potential sources of bias                                                                                                                                                                                                                                                                                                                                                                                                                                                                                                                                    |  | p. 10    |  |
| Study size                   | 10 | Explain how the study size was arrived at                                                                                                                                                                                                                                                                                                                                                                                                                                                                                                                                                    |  | N/A      |  |
| Quantitative variables       | 11 | Explain how quantitative variables were handled in the analyses. If applicable, describe which groupings were chosen, and why                                                                                                                                                                                                                                                                                                                                                                                                                                                                |  | p. 10-11 |  |
| Statistical methods          | 12 | (a) Describe all statistical methods, including those used to control for confounding<br><br>(b) Describe any methods used to examine subgroups and interactions<br><br>(c) Explain how missing data were addressed<br><br>(d) <i>Cohort study</i> - If applicable, explain how loss to follow-up was addressed<br><br><i>Case-control study</i> - If applicable, explain how matching of cases and controls was addressed<br><br><i>Cross-sectional study</i> - If applicable, describe analytical methods taking account of sampling strategy<br><br>(e) Describe any sensitivity analyses |  | p. 10-11 |  |



|                                  |    |                                                                                                                                                                                                                                                                                                                                     |                                                                                                                                                                                                                                                                                                                         |          |
|----------------------------------|----|-------------------------------------------------------------------------------------------------------------------------------------------------------------------------------------------------------------------------------------------------------------------------------------------------------------------------------------|-------------------------------------------------------------------------------------------------------------------------------------------------------------------------------------------------------------------------------------------------------------------------------------------------------------------------|----------|
| Data access and cleaning methods |    | ..                                                                                                                                                                                                                                                                                                                                  | <p>RECORD 12.1: Authors should describe the extent to which the investigators had access to the database population used to create the study population.</p> <p>RECORD 12.2: Authors should provide information on the data cleaning methods used in the study.</p>                                                     | N/A      |
| Linkage                          |    | ..                                                                                                                                                                                                                                                                                                                                  | <p>RECORD 12.3: State whether the study included person-level, institutional-level, or other data linkage across two or more databases. The methods of linkage and methods of linkage quality evaluation should be provided.</p>                                                                                        | p. 9     |
| <b>Results</b>                   |    |                                                                                                                                                                                                                                                                                                                                     |                                                                                                                                                                                                                                                                                                                         |          |
| Participants                     | 13 | <p>(a) Report the numbers of individuals at each stage of the study (<i>e.g.</i>, numbers potentially eligible, examined for eligibility, confirmed eligible, included in the study, completing follow-up, and analysed)</p> <p>(b) Give reasons for non-participation at each stage.</p> <p>(c) Consider use of a flow diagram</p> | <p>RECORD 13.1: Describe in detail the selection of the persons included in the study (<i>i.e.</i>, study population selection) including filtering based on data quality, data availability and linkage. The selection of included persons can be described in the text and/or by means of the study flow diagram.</p> | p. 13-14 |

|                  |    |                                                                                                                                                                                                                                                                                                                                                                                                                                       |  |          |
|------------------|----|---------------------------------------------------------------------------------------------------------------------------------------------------------------------------------------------------------------------------------------------------------------------------------------------------------------------------------------------------------------------------------------------------------------------------------------|--|----------|
| Descriptive data | 14 | <p>(a) Give characteristics of study participants (<i>e.g.</i>, demographic, clinical, social) and information on exposures and potential confounders</p> <p>(b) Indicate the number of participants with missing data for each variable of interest</p> <p>(c) <i>Cohort study</i> - summarise follow-up time (<i>e.g.</i>, average and total amount)</p>                                                                            |  | p. 13-14 |
| Outcome data     | 15 | <p><i>Cohort study</i> - Report numbers of outcome events or summary measures over time</p> <p><i>Case-control study</i> - Report numbers in each exposure category, or summary measures of exposure</p> <p><i>Cross-sectional study</i> - Report numbers of outcome events or summary measures</p>                                                                                                                                   |  | p. 14-15 |
| Main results     | 16 | <p>(a) Give unadjusted estimates and, if applicable, confounder-adjusted estimates and their precision (<i>e.g.</i>, 95% confidence interval). Make clear which confounders were adjusted for and why they were included</p> <p>(b) Report category boundaries when continuous variables were categorized</p> <p>(c) If relevant, consider translating estimates of relative risk into absolute risk for a meaningful time period</p> |  | p. 14-15 |

|                   |    |                                                                                                                                                                            |                                                                                                                                                                                                                                                                                                          |       |
|-------------------|----|----------------------------------------------------------------------------------------------------------------------------------------------------------------------------|----------------------------------------------------------------------------------------------------------------------------------------------------------------------------------------------------------------------------------------------------------------------------------------------------------|-------|
| Other analyses    | 17 | Report other analyses done—e.g., analyses of subgroups and interactions, and sensitivity analyses                                                                          |                                                                                                                                                                                                                                                                                                          | p. 16 |
| Discussion        |    |                                                                                                                                                                            |                                                                                                                                                                                                                                                                                                          |       |
| Key results       | 18 | Summarise key results with reference to study objectives                                                                                                                   |                                                                                                                                                                                                                                                                                                          | p. 16 |
| Limitations       | 19 | Discuss limitations of the study, taking into account sources of potential bias or imprecision. Discuss both direction and magnitude of any potential bias                 | RECORD 19.1: Discuss the implications of using data that were not created or collected to answer the specific research question(s). Include discussion of misclassification bias, unmeasured confounding, missing data, and changing eligibility over time, as they pertain to the study being reported. | p. 17 |
| Interpretation    | 20 | Give a cautious overall interpretation of results considering objectives, limitations, multiplicity of analyses, results from similar studies, and other relevant evidence |                                                                                                                                                                                                                                                                                                          | p. 18 |
| Generalisability  | 21 | Discuss the generalisability (external validity) of the study results                                                                                                      |                                                                                                                                                                                                                                                                                                          | p. 18 |
| Other Information |    |                                                                                                                                                                            |                                                                                                                                                                                                                                                                                                          |       |
| Funding           | 22 | Give the source of funding and the role of the funders for the present study and, if applicable, for the original study on which the present article is based              |                                                                                                                                                                                                                                                                                                          | p. 4  |

|                                                           |  |    |                                                                                                                                                          |      |
|-----------------------------------------------------------|--|----|----------------------------------------------------------------------------------------------------------------------------------------------------------|------|
| Accessibility of protocol, raw data, and programming code |  | .. | RECORD 22.1: Authors should provide information on how to access any supplemental information such as the study protocol, raw data, or programming code. | p. 7 |
|-----------------------------------------------------------|--|----|----------------------------------------------------------------------------------------------------------------------------------------------------------|------|
